# Supplementary material
Source: PubMed Central journal article supplement (PMC3754191)
Supplement: AEM.01797-13_zam999104689so1.pdf [file AEM.01797-13_zam999104689so1.pdf]

Supplemental Table 1. Q-PCR primers and probes used in this study.

| Target Gene | Forward Primer (5' → 3')    | Probe (5' → 3')             | Reverse Primer (5' → 3') | Source    |
|-------------|-----------------------------|-----------------------------|--------------------------|-----------|
| <i>rpoB</i> | CCGGACGTCACGGTAACAA         | TTATCTCCCGTATTTTACC         | CAGGTGTTCCGTCTGGCATA     | (1)       |
| <i>liaH</i> | GAAGAAGTGGCTCAATATGAAGAA    | TTAGAAGCTACAAAAGCAC         | TGTTCCGACGCTTGATCGTA     | (2)       |
| <i>liaI</i> | AAGGAATTCTGGTTGTTGTAATTATCG | TCGAATACGTCATCATTTTTTCTTG   | AGCAATCATTTACTTCCTAAC    | This work |
| <i>liaR</i> | GGCGGAGACTCTGTTCTTGAA       | CAGAAGTAACTGGC              | TAGCGGTTAGCCGTT          | (2)       |
| lmo1746     | CGCTGGTTGTTTCCGATGA         | CAACGATTGTTTGCACTTTCTTATC   | CCTGAATCTGTGACAATG       | This work |
| lmo1967     | TTGCTAACCCGTTTGGATCAG       | TTCGATTTGTTTGGATAACTCTAATGC | AAATAATGAAACAGATGCAGCTC  | This work |
| lmo2229     | GCTGCGACAATTGCTGGATT        | CGATTAGTCGCTTTGTGCGATATGT   | CTTCAAGCTCCAAGTGCCTA     | This work |

References:

1. **Bergholz, T. M., H. C. den Bakker, E. D. Fortes, K. J. Boor, and M. Wiedmann.** 2010. Salt stress phenotypes in *Listeria monocytogenes* vary by genetic lineage and temperature. *Foodborne Pathog Dis* **7**:1537-49.
2. **Bergholz, T. M., B. Bowen, M. Wiedmann, and K. J. Boor.** 2012. *Listeria monocytogenes* shows temperature dependent and independent responses to salt stress, including responses that induce cross-protection to other stresses. *Appl Environ Microbiol* **78**:2602-2612.
